# Supplementary material for: Visual Deprivation Alters Functional Connectivity of Neural Networks for Voice Recognition: A Resting-State fMRI Study
Source: MDPI journal article supplement (doi:10.3390/brainsci13040636), 2023-04-07
Supplement: s1 [file s1]

# Supplementary Materials

**Table S1.** Characteristics of the early blind participants.

| Subject | Age | Gender | Handedness | Residual vision | Onset of blindness | Cause of blindness               |
|---------|-----|--------|------------|-----------------|--------------------|----------------------------------|
| EB1     | 20  | M      | R          | None            | 4 yrs              | Retinal hemorrhage               |
| EB2     | 22  | M      | R          | None            | Birth              | Oxygen intoxication              |
| EB3     | 35  | M      | R          | None            | Birth              | Unknown congenital eye condition |
| EB4     | 22  | F      | R          | Minimal LP      | Birth              | Retinal detachment               |
| EB5     | 20  | M      | R          | Minimal LP      | Birth              | Optic nerve atrophy              |
| EB6     | 20  | M      | R          | None            | Birth              | Glaucoma                         |
| EB7     | 25  | F      | R          | Minimal LP      | Birth              | Retinal detachment               |
| EB8     | 20  | M      | R          | None            | 4 yrs              | Unknown congenital eye condition |
| EB9     | 21  | M      | R          | Minimal LP      | Birth              | Amblyopia                        |
| EB10    | 23  | M      | R          | None            | 0~3 yrs            | Glaucoma                         |
| EB11    | 26  | M      | R          | Minimal LP      | Birth              | Optic nerve atrophy              |
| EB12    | 18  | M      | R          | Minimal LP      | Birth              | Optic nerve atrophy              |
| EB13    | 18  | M      | R          | Minimal LP      | Birth              | Cataract                         |
| EB14    | 23  | F      | R          | Minimal LP      | Birth              | Optic nerve atrophy              |
| EB15    | 21  | M      | R          | None            | Birth              | Aplasia of macula                |
| EB16    | 24  | F      | R          | None            | Birth              | Retinoblastoma                   |
| EB17    | 26  | M      | R          | None            | 0~2 yrs            | Optic nerve atrophy              |
| EB18    | 24  | M      | R          | None            | Birth              | Microphthalmia                   |
| EB19    | 22  | M      | R          | Minimal LP      | Birth              | Cataract                         |
| EB20    | 21  | F      | R          | Minimal LP      | Birth              | Angiomatosis                     |

Note: Gender (M, male; F, female), handedness (R, right-handed). The onset of blindness is defined as the absence of vision with at most minimal light perception.

Abbreviations: EB, early blind; LP, light perception; yrs, years.

**Table S2.** Region coordinates for defined regions of interest in the left hemisphere.

| ROI    | Region                                | x   | y   | z   | Literature                                                            |
|--------|---------------------------------------|-----|-----|-----|-----------------------------------------------------------------------|
| L.TVAp | posterior superior temporal gyrus     | -46 | -38 | 2   | Pernet et al., <i>NeuroImage</i> , 2015                               |
| L.TVAa | anterior superior temporal sulcus     | -55 | -8  | -3  | Pernet et al., <i>NeuroImage</i> , 2015                               |
| L.AMY  | amygdala                              | -21 | -5  | -16 | Sergerie et al., <i>Neuroscience and Biobehavioral Reviews</i> , 2008 |
| L.IFG  | inferior frontal gyrus (triangularis) | -48 | 14  | 29  | Blank et al., <i>Neuroscience and Biobehavioral Reviews</i> , 2014    |
| L.FFA  | fusiform gyrus                        | -38 | -49 | -22 | Blank et al., <i>Neuroscience and Biobehavioral Reviews</i> , 2014    |
| L.OFA  | middle occipital gyrus                | -30 | -90 | 12  | Blank et al., <i>Neuroscience and Biobehavioral Reviews</i> , 2014    |

Abbreviations: L, left hemisphere; TVAp, posterior “temporal voice areas”; TVAa, anterior “temporal voice areas”; AMY, amygdala; IFG, inferior frontal gyrus; FFA, fusiform face area; OFA, occipital face area.

**Table S3.** The results of group comparisons between the sighted and blind participants in the strength of functional connectivity.

| Functional Connectivity | <i>t</i> -value | <i>p</i> | <i>p</i> -FDR | <i>d</i> |
|-------------------------|-----------------|----------|---------------|----------|
| TVAp-TVAA               | 0.487           | 0.629    | 0.726         | 0.151    |
| TVAp-AMY                | -2.947          | 0.005    | 0.027         | 0.911    |
| TVAp-IFG                | -0.752          | 0.457    | 0.623         | 0.232    |
| TVAp-FFA                | 0.243           | 0.809    | 0.809         | 0.075    |
| TVAp-OFA                | 0.400           | 0.692    | 0.741         | 0.124    |
| TVAA-AMY                | -2.565          | 0.014    | 0.030         | 0.793    |
| TVAA-IFG                | -1.034          | 0.307    | 0.461         | 0.320    |
| TVAA-FFA                | 2.599           | 0.013    | 0.030         | 0.803    |
| TVAA-OFA                | 2.720           | 0.010    | 0.029         | 0.840    |
| AMY-IFG                 | -2.794          | 0.008    | 0.029         | 0.863    |
| AMY-FFA                 | -0.551          | 0.585    | 0.726         | 0.170    |
| AMY-OFA                 | -1.470          | 0.149    | 0.249         | 0.454    |
| IFG-FFA                 | -3.214          | 0.003    | 0.019         | 0.993    |
| IFG-OFA                 | -4.702          | < .001   | < .001        | 1.453    |
| FFA-OFA                 | 1.759           | 0.086    | 0.162         | 0.544    |

Abbreviations: TVAp, posterior “temporal voice areas”; TVAA, anterior “temporal voice areas”; AMY, amygdala; IFG, inferior frontal gyrus; FFA, fusiform face area; OFA, occipital face area.

**Table S4.** The results of group comparisons between the sighted control and early blind subjects in the strength of functional connectivity in the left hemisphere.

| Functional Connectivity | <i>t</i> -value | <i>p</i> | <i>p</i> -FDR |
|-------------------------|-----------------|----------|---------------|
| L.TVAp-L.TVAa           | 0.640           | 0.526    | 0.617         |
| L.TVAp-L.AMY            | 0.225           | 0.823    | 0.823         |
| L.TVAp-L.IFG            | -0.693          | 0.492    | 0.617         |
| L.TVAp-L.FFA            | 0.839           | 0.407    | 0.610         |
| L.TVAp-L.OFA            | 1.833           | 0.074    | 0.171         |
| L.TVAa-L.AMY            | -0.565          | 0.575    | 0.617         |
| L.TVAa-L.IFG            | -0.564          | 0.576    | 0.617         |
| L.TVAa-L.FFA            | 1.181           | 0.244    | 0.407         |
| L.TVAa-L.OFA            | 1.420           | 0.163    | 0.306         |
| L.AMY-L.IFG             | -2.408          | 0.021    | 0.078         |
| L.AMY-L.FFA             | -3.061          | 0.004    | 0.020         |
| L.AMY-L.OFA             | -1.797          | 0.080    | 0.171         |
| L.IFG-L.FFA             | -3.941          | < .001   | 0.005         |
| L.IFG-L.OFA             | -3.571          | 0.001    | 0.007         |
| L.FFA-L.OFA             | -2.301          | 0.027    | 0.080         |

Abbreviations: L, left hemisphere; TVAp, posterior “temporal voice areas”; TVAa, anterior “temporal voice areas”; AMY, amygdala; IFG, inferior frontal gyrus; FFA, fusiform face area; OFA, occipital face area.

**Table S5.** Correlation of voice recognition accuracy and the strength of functional connectivity in the sighted.

| <i>r</i>  | CN-GP  | CN-DP  | JP-GP  | JP-DP  |
|-----------|--------|--------|--------|--------|
| TVAp-TVAA | 0.079  | 0.118  | 0.064  | 0.014  |
| TVAp-AMY  | .471*  | .436*  | 0.268  | 0.144  |
| TVAp-IFG  | 0.015  | -0.204 | -0.020 | -0.046 |
| TVAp-FFA  | .640** | 0.210  | 0.310  | -0.043 |
| TVAp-OFA  | 0.419  | 0.234  | 0.332  | 0.078  |
| TVAA-AMY  | .441*  | 0.213  | 0.136  | 0.080  |
| TVAA-IFG  | 0.058  | -0.080 | -0.184 | -0.317 |
| TVAA-FFA  | .484*  | 0.189  | 0.171  | 0.275  |
| TVAA-OFA  | .502*  | 0.246  | 0.180  | 0.140  |
| AMY-IFG   | 0.048  | 0.216  | -0.141 | -0.182 |
| AMY-FFA   | -0.315 | -0.123 | 0.265  | 0.395  |
| AMY-OFA   | 0.185  | 0.133  | 0.171  | 0.194  |
| IFG-FFA   | -0.230 | -0.073 | 0.107  | 0.044  |
| IFG-OFA   | -0.090 | -0.037 | -0.004 | 0.064  |
| FFA-OFA   | 0.374  | 0.253  | 0.046  | -0.052 |

Note: Significance indicated by \* ( $p$  uncorrected < .05), \*\* ( $p$  uncorrected < .01).

Abbreviations: TVAp, posterior “temporal voice areas”; TVAA, anterior “temporal voice areas”; AMY, amygdala; IFG, inferior frontal gyrus; FFA, fusiform face area; OFA, occipital face area; CN, Chinese condition; JP, Japanese condition; GP, generalization phase; DP, delayed memory phase.

**Table S6.** Correlation of voice recognition accuracy and the strength of functional connectivity in the blind.

| <i>r</i>  | CN-GP  | CN-DP  | JP-GP  | JP-DP  |
|-----------|--------|--------|--------|--------|
| TVAp-TVAA | -0.196 | -0.063 | -0.325 | -0.256 |
| TVAp-AMY  | -0.286 | -0.319 | -0.320 | -0.039 |
| TVAp-IFG  | -0.163 | -0.120 | -0.151 | -0.162 |
| TVAp-FFA  | -0.014 | 0.070  | 0.048  | -0.115 |
| TVAp-OFA  | -0.049 | 0.046  | -0.083 | -0.023 |
| TVAA-AMY  | -0.265 | -0.169 | -0.308 | -0.075 |
| TVAA-IFG  | -0.009 | 0.125  | 0.068  | 0.079  |
| TVAA-FFA  | 0.162  | 0.174  | 0.006  | 0.029  |
| TVAA-OFA  | 0.044  | 0.171  | 0.058  | -0.007 |
| AMY-IFG   | 0.052  | -0.078 | -0.138 | -0.150 |
| AMY-FFA   | .607** | .560*  | .544*  | .765** |
| AMY-OFA   | .468*  | .532*  | 0.372  | .557*  |
| IFG-FFA   | 0.031  | -0.010 | -0.068 | 0.139  |
| IFG-OFA   | -0.285 | -0.126 | -0.150 | -0.123 |
| FFA-OFA   | .509*  | .461*  | 0.231  | 0.294  |

Note: Significance indicated by \* ( $p$  uncorrected < .05), \*\* ( $p$  uncorrected < .01).

Abbreviations: TVAp, posterior “temporal voice areas”; TVAA, anterior “temporal voice areas”; AMY, amygdala; IFG, inferior frontal gyrus; FFA, fusiform face area; OFA, occipital face area; CN, Chinese condition; JP, Japanese condition; GP, generalization phase; DP, delayed memory phase.

**Table S7.** The comparisons of correlations between the sighted control and early blind groups

| <i>p</i>  | CN-GP  | CN-DP | JP-GP | JP-DP |
|-----------|--------|-------|-------|-------|
| TVAp-TVAA | 0.406  | 0.586 | 0.229 | 0.409 |
| TVAp-AMY  | .016*  | .017* | 0.069 | 0.582 |
| TVAp-IFG  | 0.591  | 0.796 | 0.692 | 0.725 |
| TVAp-FFA  | .021*  | 0.668 | 0.414 | 0.828 |
| TVAp-OFA  | 0.138  | 0.564 | 0.200 | 0.762 |
| TVAA-AMY  | .026*  | 0.246 | 0.173 | 0.642 |
| TVAA-IFG  | 0.841  | 0.538 | 0.446 | 0.222 |
| TVAA-FFA  | 0.275  | 0.963 | 0.618 | 0.448 |
| TVAA-OFA  | 0.128  | 0.814 | 0.711 | 0.658 |
| AMY-IFG   | 0.990  | 0.373 | 0.993 | 0.922 |
| AMY-FFA   | .002** | .024* | 0.311 | 0.077 |
| AMY-OFA   | 0.337  | 0.169 | 0.514 | 0.196 |
| IFG-FFA   | 0.427  | 0.850 | 0.599 | 0.774 |
| IFG-OFA   | 0.543  | 0.788 | 0.659 | 0.574 |
| FFA-OFA   | 0.614  | 0.472 | 0.571 | 0.288 |

*Note:* Significance indicated by \* ( $p$  uncorrected < .05), \*\* ( $p$  uncorrected < .01).

Abbreviations: TVAp, posterior “temporal voice areas”; TVAA, anterior “temporal voice areas”; AMY, amygdala; IFG, inferior frontal gyrus; FFA, fusiform face area; OFA, occipital face area; CN, Chinese condition; JP, Japanese condition; GP, generalization phase; DP, delayed memory phase.
